# Supplementary material for: Honokiol Antagonizes Cadmium-Induced Nephrotoxicity in Quail by Alleviating Autophagy Dysfunction, Apoptosis and Mitochondrial UPR Inhibition with Its Antioxidant Properties
Source: MDPI journal article supplement (doi:10.3390/life12101574), 2022-10-10
Supplement: s1 [file s1]

Table S1 Primer sequences of mRNA for QRT-PCR

| Gene            | Primer (5'→3')           | Product length/bp | Genbank No  |
|-----------------|--------------------------|-------------------|-------------|
| <i>Nrf2-F</i>   | AAACAGCGGCGGAACGAG       | 195               | NC_029522.1 |
| <i>Nrf2-R</i>   | AAAAACTTCACGCCTTGCCC     |                   |             |
| <i>Hmox1-F</i>  | TCCTGGCACTCGGTTTCATC     | 159               | NC_029516.1 |
| <i>Hmox1-R</i>  | ATCACAGCACCCAGTCGAAG     |                   |             |
| <i>Gss-F</i>    | ATGACGTGGACTGCCTTCTG     | 102               | NC_029535.1 |
| <i>Gss-R</i>    | CCACATGGTTCTGGGCATCT     |                   |             |
| <i>Gpx4-F</i>   | TGATGCTCCCCTTCATCTCG     | 189               | NC_029543.1 |
| <i>Gpx4-R</i>   | TCCAGCAGATGCACGCTAAA     |                   |             |
| <i>Sod2-F</i>   | GTTACAGCTCAGGTGTCGCT     | 155               | NC_029518.1 |
| <i>Sod2-R</i>   | GCGAAAGAACCGAAGTCACG     |                   |             |
| <i>Lc3b-F</i>   | CGCACCTTCGAGCAAAGA       | 150               | NC_029526.1 |
| <i>Lc3b-R</i>   | CATGTTGACGTGATCTGGCA     |                   |             |
| <i>Becn1-F</i>  | AACTGAAAGAACTGGCACTGGA   | 147               | NC_029542.1 |
| <i>Becn1-R</i>  | GACCACTGTGCTGAGCTTCCT    |                   |             |
| <i>Atg5-F</i>   | GAACCGATTCCGGAGCTGAA     | 193               | NC_029518.1 |
| <i>Atg5-R</i>   | TGAAGCAGGTTGGTATGCGT     |                   |             |
| <i>Sqstm1-F</i> | CGCTGCTGGAGGTATTGAAGT    | 112               | NC_029528.1 |
| <i>Sqstm1-R</i> | AGTACTGCTGCTTGACTCGG     |                   |             |
| <i>Lamp2-F</i>  | GCTCGGAACCTGCGGTTTTT     | 197               | NC_029519.1 |
| <i>Lamp2-R</i>  | TGTCACTGCCACAGATGCTT     |                   |             |
| <i>Tfeb-F</i>   | CTGGGCCTTCCAGTTTGGTT     | 127               | NC_029541.1 |
| <i>Tfeb-R</i>   | TTGAAGCGAGACCTCCGTTG     |                   |             |
| <i>Rab7-F</i>   | GTGGTTGGGCCCCGATAAAG     | 100               | NC_029527.1 |
| <i>Rab7-R</i>   | GAAGTCATCTTTTAAACGTGGTGC |                   |             |
| <i>Cstb-F</i>   | GAGGACAAGCACTACGGCAT     | 148               | NC_029518.1 |
| <i>Cstb-R</i>   | CATGCTGGTACACCCCAGAT     |                   |             |

| Gene              | Primer (5'→3')        | Product length/bp | Genbank No  |
|-------------------|-----------------------|-------------------|-------------|
| <i>Cstd-F</i>     | CACTGTCACCTGCTGGACAT  | 160               | NC_029520.1 |
| <i>Cstd-R</i>     | TCAGGTTACCAAGCGTGACT  |                   |             |
| <i>Casp3-F</i>    | CCGGAGGTGAGGAGCTGAT   | 144               | NC_029519.1 |
| <i>Casp3-R</i>    | TCCAGAATCCACAGACTTGCT |                   |             |
| <i>Bak1-F</i>     | ATCTTCCTGAGGTGCTTCGC  | 100               | NC_029541.1 |
| <i>Bak1-R</i>     | GGCTCGGTCATCTACCACAG  |                   |             |
| <i>Bcl2-F</i>     | TCATTTTGGATCTGCCGTCG  | 161               | NC_029517.1 |
| <i>Bcl2-R</i>     | CGATGCTTTGATGCTTCGGG  |                   |             |
| <i>Sirt1-F</i>    | TGACAGGAGCTGGGGTGT    | 197               | NC_029521.1 |
| <i>Sirt1-R</i>    | AGATGGCTGGAATTGGCCTG  |                   |             |
| <i>Sirt3-F</i>    | AGGGCTCCTTCTACGTCTCT  | 165               | NC_029520.1 |
| <i>Sirt3-R</i>    | GCCATAACGTCTCCCCTGAA  |                   |             |
| <i>Nrf1-F</i>     | ACCGTCCGAGTTCCTGGATA  | 172               | NC_029516.1 |
| <i>Nrf1-R</i>     | CCTGATGTCTCGGATGAGGC  |                   |             |
| <i>Ppargc1a-F</i> | CAGACCCAGGAAGAGCGTC   | 109               | NC_029519.1 |
| <i>Ppargc1a-R</i> | TGCACTCCTCGATTTCACCAA |                   |             |
| <i>Ppargc1β-F</i> | GGAGAAACCCCTTTCCAGG   | 111               | NC_029528.1 |
| <i>Ppargc1β-R</i> | ACCTGAAGGTGCATCTGCTT  |                   |             |
| <i>Tfam-F</i>     | GCAGCTCGCTCAAGACGATA  | 108               | NC_029521.1 |
| <i>Tfam-R</i>     | CGCTGCTCTCTGGAACGTAT  |                   |             |
| <i>Gapdh-F</i>    | TGTCTATAAAGGGCGGCGGA  | 128               | NC_029516.1 |
| <i>Gapdh-R</i>    | CCAATACGGCCAAATCCGTT  |                   |             |
